# Supplementary material
Source: publisher figshare collection journal article supplement (https://acs.figshare.com/ndownloader/files/7311884)
Supplement: Supplementary file 1 [file 7311884]

## Supplementary Information

### **Biodiesel via in-situ Wet Microalgae Biotransformation: Zwitter-Type Ionic Liquid supported Extraction and Transesterification**

Gerald Bauer, Serena Lima, Jean Chenevard, Marc Sugnaux, Fabian Fischer\*

The Supplementary Information file contains the following:

Figures: 1

Tables: 3

Total pages: 5

Including:

Raw data corresponding to Table 1,2 and 3 (main manuscript).

Photos of *C. zoofingiensis* after cultivation in the flat panel photobioreactor, LED shaker, after biotransformation (blank reaction), and after biotransformation with Oct-PrSO<sub>3</sub>.

Institute of Life Technologies, HES-SO Valais, University of Applied Sciences Western Switzerland, Route du Rawyl 64, CH-1950 Sion, Switzerland.

\*Corresponding author:

fabian.fischer@hevs.ch; Tel:+41(0)27 606 86 58, Fax: +41(0)27 606 86 15.

General Remarks to Tables S1-S2:

The obtained yields after biotransformation and work-up are depicted in the column “uncorrected”. In order to eliminate the manipulation error during the work-up and isolation of the products, the obtained conversions were corrected to a 100% conversion (values are depicted in the column “corrected”)

**Table S1:** Raw data corresponding to Table 1 (main manuscript).

| Entry | Biodiesel<br>uncorrected<br>[%] | Biodiesel<br>corrected<br>[%] | Biodiesel<br>average<br>[%] | Rest Oil<br>uncorrected<br>[%] | Rest Oil<br>corrected<br>[%] | Rest Oil<br>average<br>[%] | free FA<br>uncorrected<br>[%] | free FA<br>corrected<br>[%] | free FA<br>average<br>[%] |
|-------|---------------------------------|-------------------------------|-----------------------------|--------------------------------|------------------------------|----------------------------|-------------------------------|-----------------------------|---------------------------|
| 1     | 21%                             | 21%                           | 25±3%                       | 63%                            | 64%                          | 61 ±3%                     | 14%                           | 15%                         | 14±1%                     |
|       | 26%                             | 28%                           |                             | 54%                            | 58%                          |                            | 13%                           | 14%                         |                           |
| 2     | 14%                             | 14%                           | 18±4%                       | 83%                            | 86%                          | 83±4%                      | 0%                            | 0%                          | 0%                        |
|       | 6%                              | 21%                           |                             | 23%                            | 79%                          |                            | 0%                            | 0%                          |                           |
| 3     | 6%                              | 6%                            | 8±2%                        | 92%                            | 94%                          | 92±2%                      | 0%                            | 0%                          | 0%                        |
|       | 9%                              | 10%                           |                             | 83%                            | 90%                          |                            | 0%                            | 0%                          |                           |
| 4     | 60%                             | 61%                           | 62±1%                       | 38%                            | 39%                          | 38±1%                      | 0%                            | 0%                          | 0%                        |
|       | 59%                             | 63%                           |                             | 35%                            | 37%                          |                            | 0%                            | 0%                          |                           |

**Table S2:** Raw data corresponding to Table 2 (main manuscript).

| Entry | Biodiesel<br>uncorrected<br>[%] | Biodiesel<br>corrected<br>[%] | Biodiesel<br>average<br>[%] | Rest Oil<br>uncorrected<br>[%] | Rest Oil<br>corrected<br>[%] | Rest Oil<br>average<br>[%] | free FA<br>uncorrected<br>[%] | free FA<br>corrected<br>[%] | free FA<br>average<br>[%] |
|-------|---------------------------------|-------------------------------|-----------------------------|--------------------------------|------------------------------|----------------------------|-------------------------------|-----------------------------|---------------------------|
| 1     | 21%                             | 21%                           | 25±3%                       | 63%                            | 64%                          | 61±2%                      | 14%                           | 15%                         | 14±1%                     |
|       | 26%                             | 28%                           |                             | 54%                            | 58%                          |                            | 13%                           | 14%                         |                           |
| 2     | 13%                             | 20%                           | 20%                         | 51%                            | 80%                          | 80%                        | 0%                            | 0%                          | 0%                        |
| 3     | 64%                             | 65%                           | 62±5%                       | 34%                            | 35%                          | 39±5%                      | 0%                            | 0%                          | 0%                        |
|       | 58%                             | 58%                           |                             | 42%                            | 42%                          |                            | 0%                            | 0%                          |                           |
| 4     | 68%                             | 70%                           | 64±6%                       | 30%                            | 30%                          | 36±6%                      | 0%                            | 0%                          | 0%                        |
|       | 60%                             | 58%                           |                             | 44%                            | 42%                          |                            | 0%                            | 0%                          |                           |
| 5     | 60%                             | 61%                           | 62±1%                       | 38%                            | 39%                          | 38±1%                      | 0%                            | 0%                          | 0%                        |
|       | 58%                             | 63%                           |                             | 35%                            | 37%                          |                            | 0%                            | 0%                          |                           |
| 6     | 57%                             | 58%                           | 55±3%                       | 42%                            | 42%                          | 45±3%                      | 0%                            | 0%                          | 0%                        |
|       | 56%                             | 53%                           |                             | 49%                            | 47%                          |                            | 0%                            | 0%                          |                           |

**Table S3:** Raw data corresponding to Table 3 (main manuscript).

| Entry | Extracted Oil<br>[%] |        | Yield Biodiesel<br>(based on total Oil)<br>[%] |       | Yield Biodiesel<br>(based on extracted Oil)<br>[%] |       | free FA<br>(based on extracted Oil)<br>[%] |       |
|-------|----------------------|--------|------------------------------------------------|-------|----------------------------------------------------|-------|--------------------------------------------|-------|
| 1     | 69%                  | 75±6%  | 11%                                            | 8±37% | 15%                                                | 10±5% | 20%                                        | 17±3% |
|       | 75%                  |        | 6%                                             |       | 9%                                                 |       | 14.4%                                      |       |
|       | 81%                  |        | 6%                                             |       | 7%                                                 |       | 18%                                        |       |
| 2     | 69%                  | 70±2%  | 5%                                             | 5±1%  | 7%                                                 | 8±1%  | 0%                                         | 0%    |
|       | 68%                  |        | 5%                                             |       | 8%                                                 |       | 0%                                         |       |
|       | 71%                  |        | 6%                                             |       | 8%                                                 |       | 0%                                         |       |
| 3     | 78%                  | 68±11% | 6%                                             | 4±1%  | 7%                                                 | 6±1%  | 0%                                         | 0%    |
|       | 52%                  |        | 3%                                             |       | 6%                                                 |       | 0%                                         |       |
|       | 71%                  |        | 4%                                             |       | 6%                                                 |       | 0%                                         |       |
|       | 71%                  |        | 4%                                             |       | 6%                                                 |       | 0%                                         |       |
| 4     | 55%                  | 60±10% | 10%                                            | 10±1% | 18%                                                | 16±2% | 0%                                         | 0%    |
|       | 55%                  |        | 9%                                             |       | 17%                                                |       | 0%                                         |       |
|       | 72%                  |        | 10%                                            |       | 14%                                                |       | 0%                                         |       |

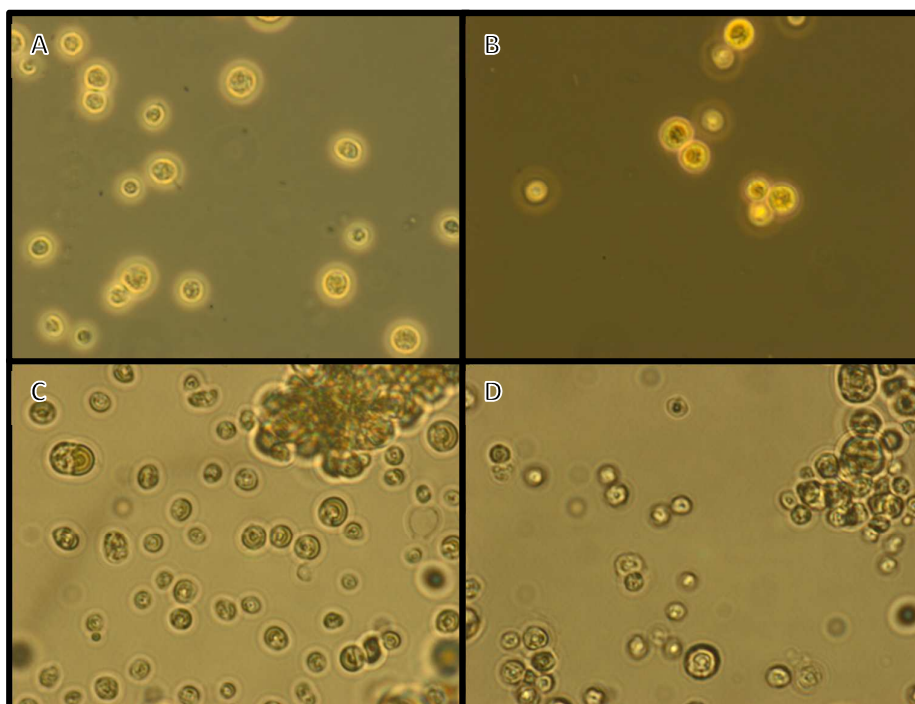

**Figure S1:** Microscopic images of microalgae from autotroph cultivations before and after lipase catalysis. (A) *C. zofingiensis* after cultivation in the flat panel photobioreactor (Labfors 5 Lux, Infors), (B) *C. zofingiensis* after cultivation in the LED shaker (Lab-Therm LT-XC, Kuhner), (C) *C. zofingiensis* after biotransformation (blank reaction; Table 3, Entry 1), (D) *C. zofingiensis* after biotransformation with Oct-PrSO<sub>3</sub> (Table 3, Entry 4)
